# Supplementary material for: MSC-Derived Exosomes Protect Vertebral Endplate Chondrocytes against Apoptosis and Calcification via the miR-31-5p/ATF6 Axis
Source: PubMed Central journal article supplement (PMC7569190; doi:10.1016/j.omtn.2020.09.026), 2020-09-26
Supplement: mmc1.pdf [file mmc1.pdf]

**OMTN, Volume 22**

**Supplemental Information**

**MSC-Derived Exosomes Protect Vertebral  
Endplate Chondrocytes against Apoptosis  
and Calcification via the miR-31-5p/ATF6 Axis**

**Lin Xie, Zhenhao Chen, Ming Liu, Weibo Huang, Fei Zou, Xiaosheng Ma, Jie Tao, Jingkang Guo, Xinlei Xia, Feizhou Lyu, Hongli Wang, Chaojun Zheng, and Jianyuan Jiang**

**Figure S1**

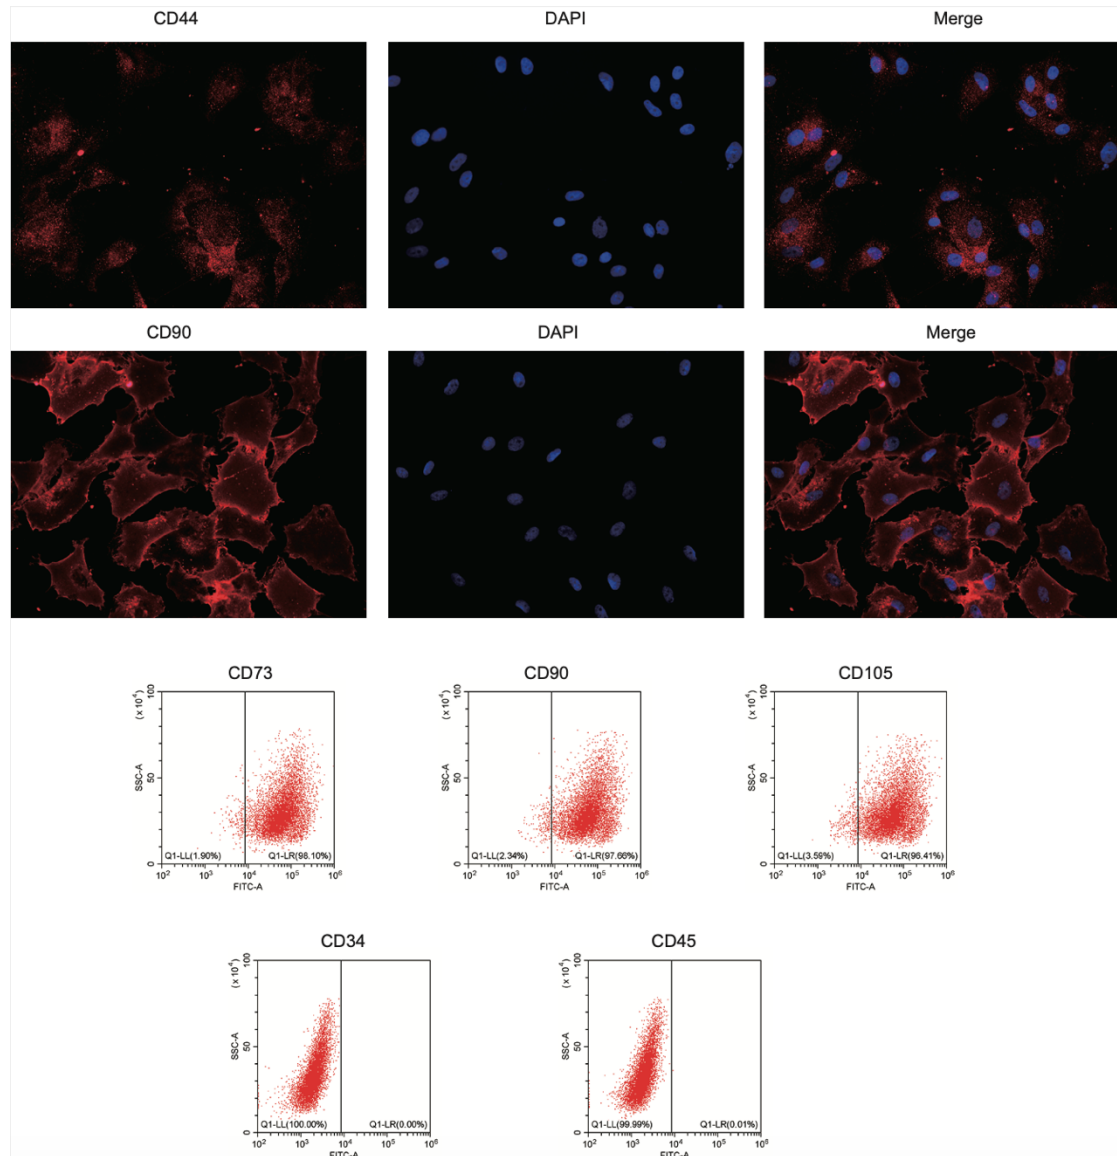

**Figure S1.** Analysis of expression patterns of CD44, CD105, CD73, and CD90, and deficiency of CD45 and CD34 surface molecules on MSCs using Immunofluorescence or flow cytometry.

**Figure S2**

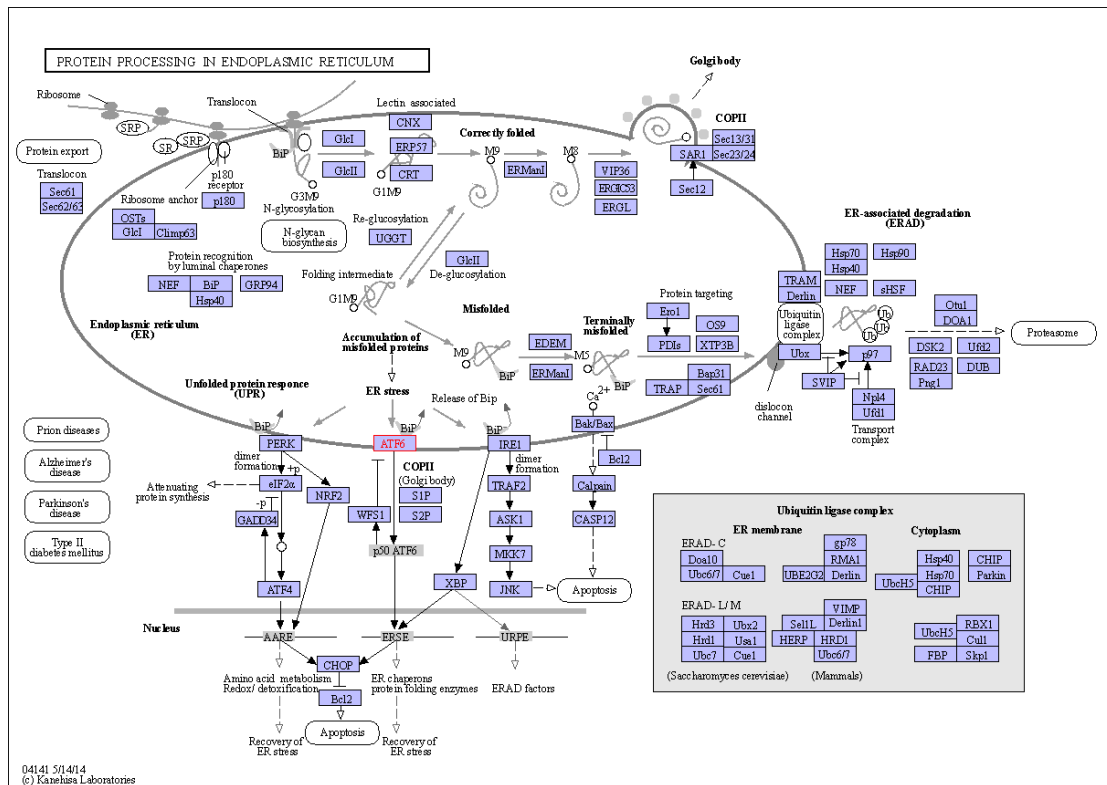

**Figure S2.** KEGG pathway showed that the direct effect of ATF6 was ER stress activation and related apoptosis pathway.

**Table S1.** MSCs and Endplate donors used for this study.

| Donor ID | Sex    | Age | Surgery Site     | Site of vertebral body for MSCs | Site of intervertebral disc for EPCs |
|----------|--------|-----|------------------|---------------------------------|--------------------------------------|
| #1       | Female | 19  | C4/5, C5/6       |                                 | C5/6                                 |
| #2       | Male   | 27  | C4/5, C5/6, C6/7 |                                 | C5/6                                 |
| #3       | Male   | 25  | C4/5, C5/6, C6/7 |                                 | C5/6                                 |
| #4       | Male   | 28  | C4/5, C5/6       |                                 | C4/5                                 |
| #5       | Male   | 20  | C4/5, C5/6, C6/7 |                                 | C4/5                                 |
| #6       | Male   | 23  | C4/5, C5/6       |                                 | C4/5                                 |
| #7       | Male   | 21  | C4/5, C5/6       |                                 | C4/5                                 |
| #8       | Male   | 21  | C4/5, C5/6, C6/7 |                                 | C4/5                                 |
| #9       | Female | 45  | C4/5, C5, C5/6   | C5                              | C4/5                                 |
| #10      | Female | 53  | C4/5, C5, C5     | C5                              | C5/6                                 |

|     |        |    |                |    |      |
|-----|--------|----|----------------|----|------|
|     |        |    | C5/6           |    |      |
| #11 | Male   | 49 | C3/4, C4, C4/5 | C4 | C4/5 |
| #12 | Female | 48 | C4/5, C5/6     |    | C4/5 |
| #13 | Male   | 49 | C4/5, C5, C5/6 | C5 | C4/5 |
| #14 | Male   | 47 | C3/4, C4, C4/5 | C4 | C4/5 |
| #15 | Female | 47 | C4/5, C5/6     |    | C4/5 |
| #16 | Female | 59 | C4/5, C5/6     |    | C4/5 |

MSCs, mesenchymal stem cells; EPCs, Endplate Chondrocytes; C, cervical vertebral body;

**Table S2.** Sequence used in this study.

|                             | Sequences                    |
|-----------------------------|------------------------------|
| U6 Forward                  | 5'-CTCGCTTCGGCAGCACA-3'      |
| U6 Reversed                 | 5'-ACGCTTACGAATTTGCGT-3'     |
| miR-31-5p Forward           | 5'-CGGCGGAGGCAAGATGCTGGCA-3' |
| miR-31-5p Reversed          | 5'-CAACTGGTGTCGTGGAGTCGG-3'  |
| agomiR-31-5p                | AGGCAAGAUGCUGGCAUAGCU        |
| agomiR-NC                   | UUUGUACUACACAAAAGUACU        |
| antagomiR-31-5p             | CAGCUAUGCCAGCAUCUUGCCU       |
| Antagomir-NC                | AAACAUGAUGUGUUUCAUGAC        |
| ATF6-siRNA<br>Sense         | AGTCGCCTTTTAGTCCGGTTC        |
| ATF6-siRNA<br>Antisense     | CTGACTCCCAAGGCATCAAAT        |
| Scramble siRNA<br>Sense     | ACCACAGTCCATGCCATCAC         |
| Scramble siRNA<br>Antisense | TCCACCACCCTGTTGCTGTA         |
